# Supplementary material for: Genome-wide analysis of the AP2/ERF family in Musa species reveals divergence and neofunctionalisation during evolution
Source: PubMed Central journal article supplement (PMC4702079; doi:10.1038/srep18878), 2016-01-06
Supplement: srep18878-s1.pdf [file srep18878-s1.pdf]

## Supplementary information

### Genome-wide analysis of the AP2/ERF family in *Musa* species reveals divergence and neofunctionalisation during evolution

Deepika Lakhwani<sup>1,2</sup>, Ashutosh Pandey<sup>1,§</sup>, Yogeshwar Vikram Dhar<sup>1</sup>, Sumit Kumar Bag<sup>1,2</sup>,  
Prabodh Kumar Trivedi<sup>1,2,\*</sup>, Mehar Hasan Asif<sup>1,2,\*</sup>

<sup>1</sup>CSIR-National Botanical Research Institute, Council of Scientific and Industrial Research (CSIR-NBRI), Rana Pratap Marg, Lucknow-226001, INDIA

<sup>2</sup>Academy of Scientific and Innovative Research (AcSIR), Anusandhan Bhawan, 2 Rafi Marg, New Delhi-110 001, India

<sup>§</sup>Present address (AP): National Agri-Food Biotechnology Institute (NABI), Mohali-160071, Punjab, INDIA

\* Authors for correspondence:

MHA: [meharasif@nbri.res.in](mailto:meharasif@nbri.res.in)

PKT: [prabodht@nbri.res.in](mailto:prabodht@nbri.res.in); [prabodht@hotmail.com](mailto:prabodht@hotmail.com)

**Running title:** AP2/ERF gene family in *Musa* species

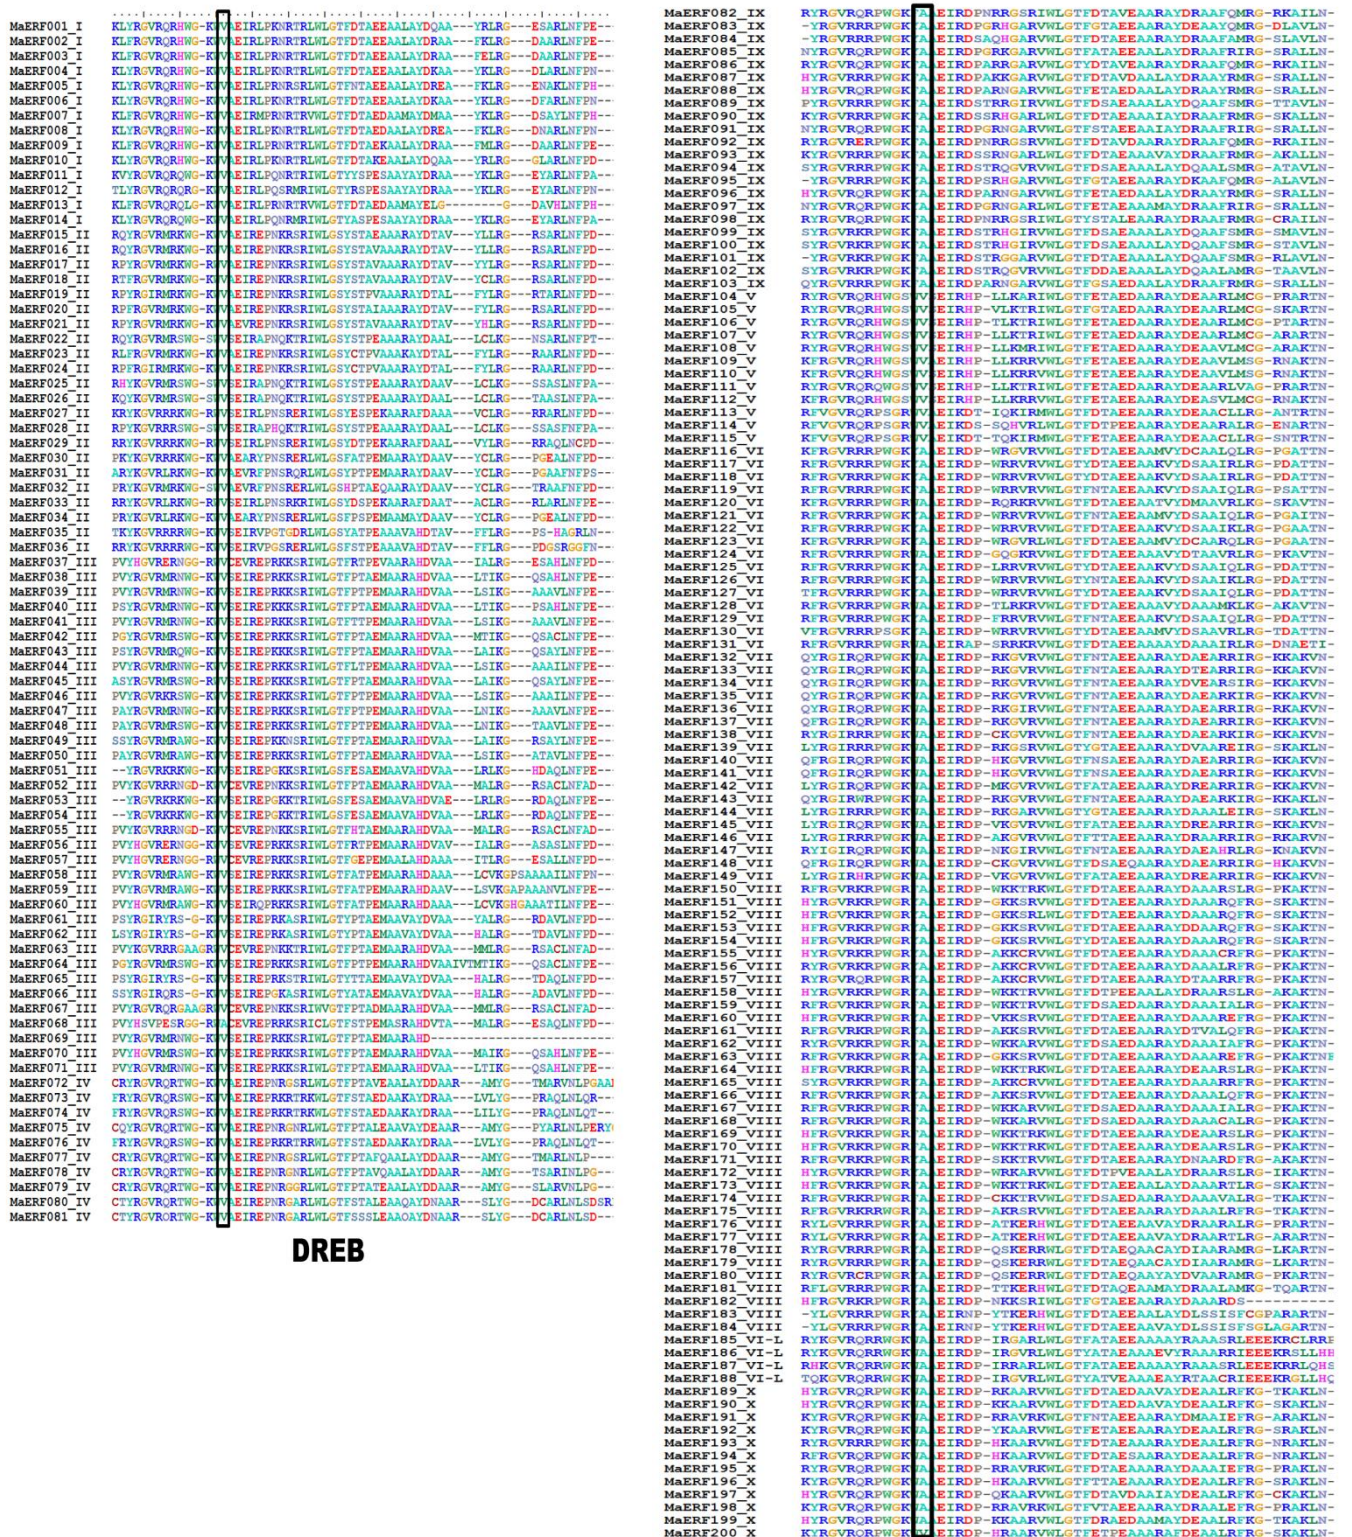

**Figure S1.** Alignment of amino acid sequences of AP2/ERF proteins of *M. acuminata*. Alignment of different groups of proteins show conserved amino acids at 14th and 19th position of DREB and ERF subfamily. White letters with black background indicate amino acids conserved pattern in ERF proteins. Red blocks show the amino acid conservation at 14th and 19th position in both groups.

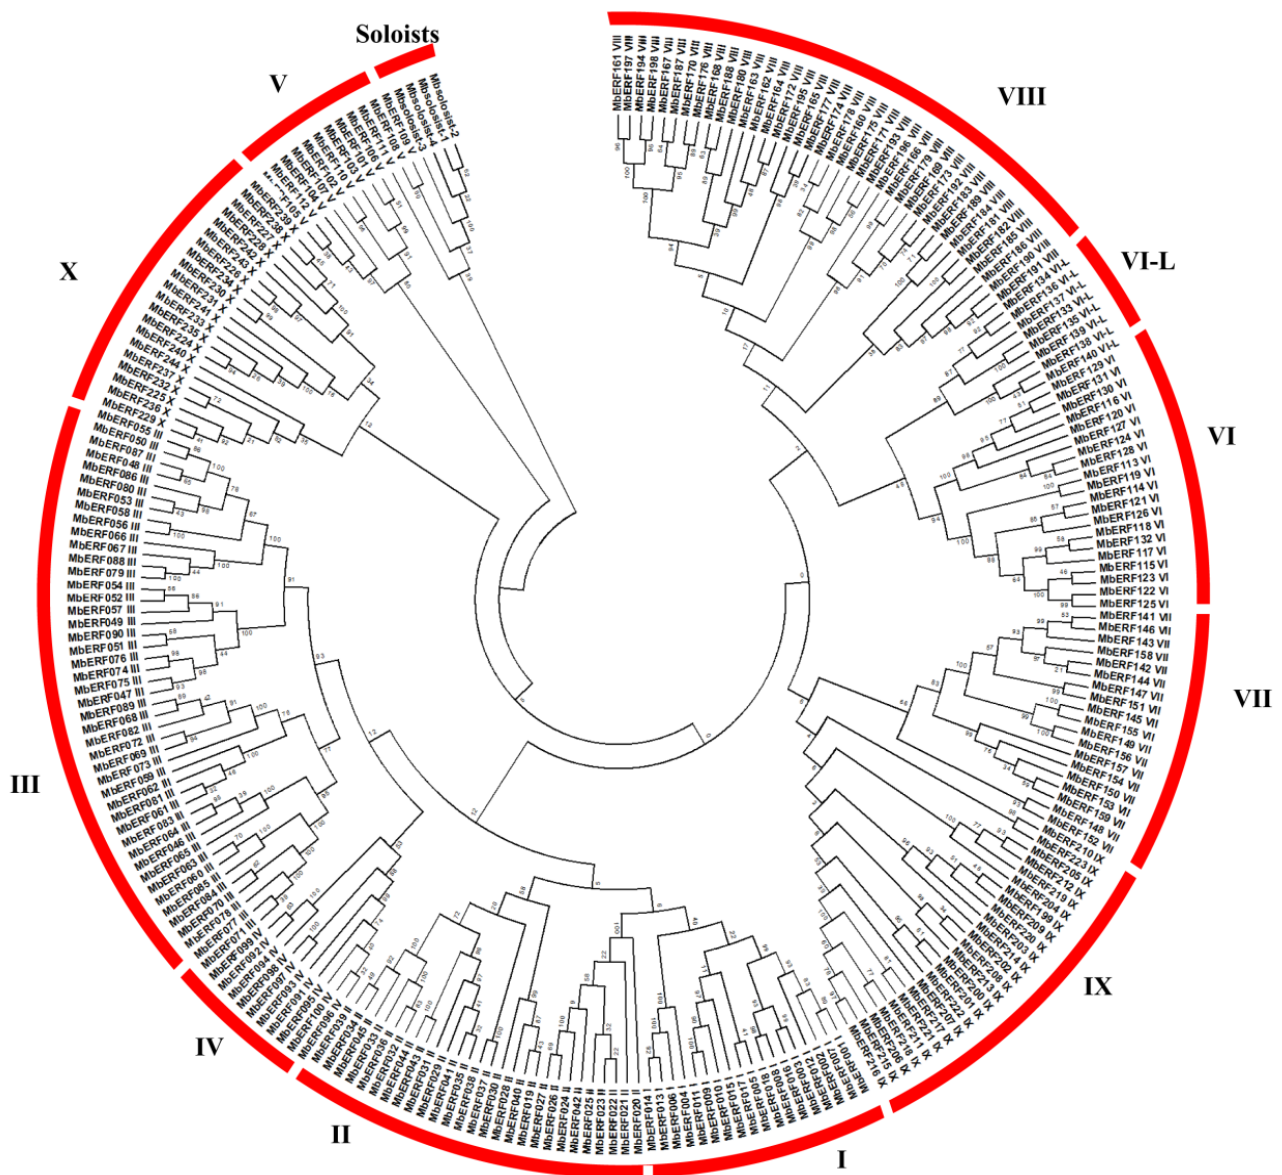

**Figure S2. Phylogenetic tree of AP2/ERF proteins of *M. balbisiana*.** AP2/ERF genes classified into different groups and showed with broken lines.

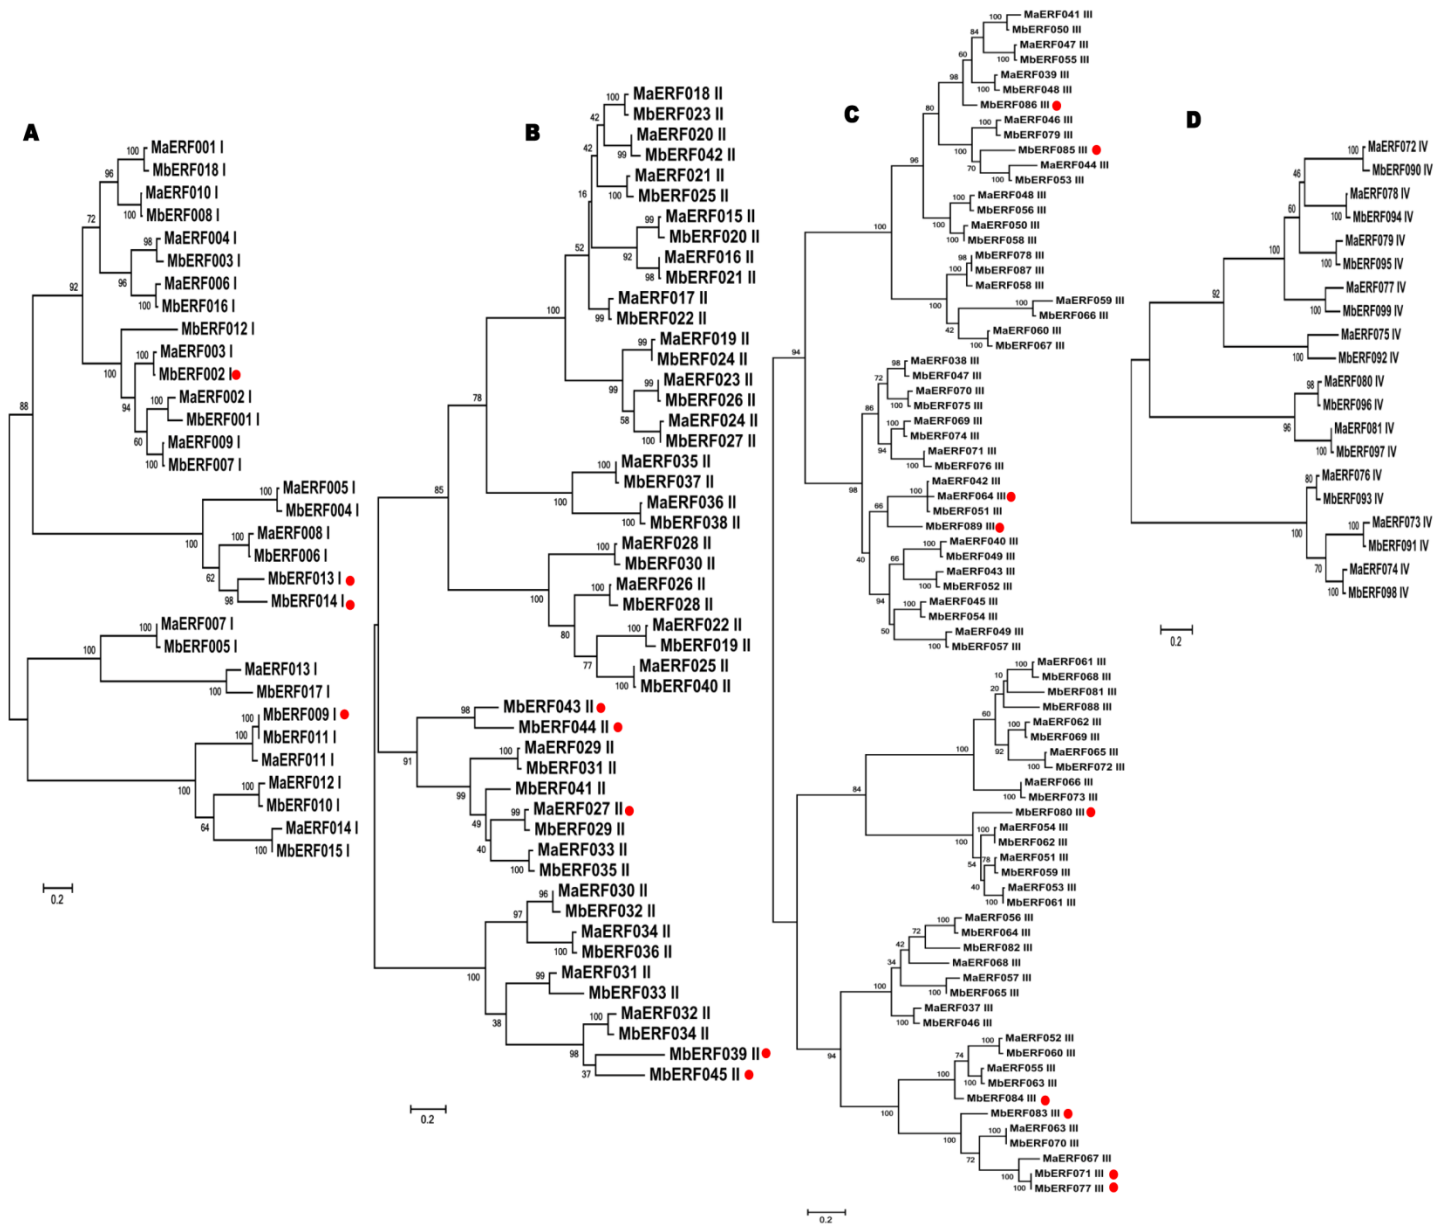

**Figure S3. Phylogenetic tree of DREB subfamily proteins of *M. acuminata* and *M. balbisiana*.**

Proteins of each group in DREB class are align with each other separately and construct tree using 500 bootstrap value. Each Tree belongs to different groups.

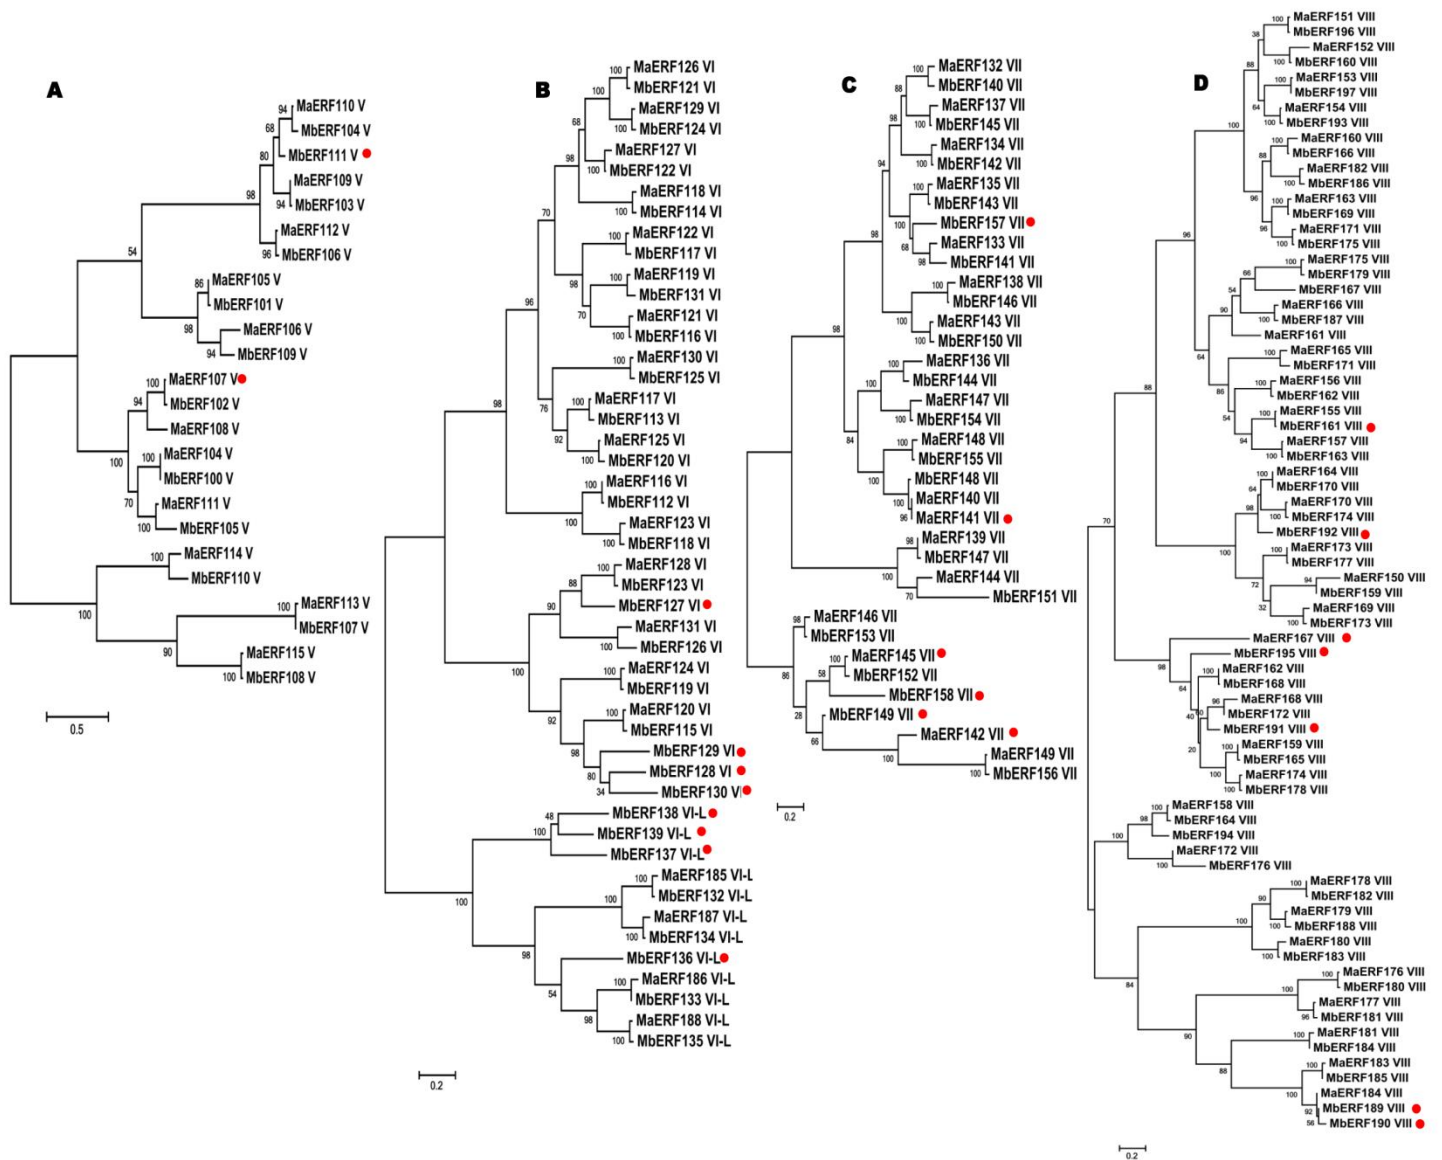

**Figure S4. Phylogenetic analysis of ERF subfamily proteins of *M. acuminata* and *M. balbisiana*.** ERF proteins of group V to VIII in ERF subfamily are aligned with each other separately and construct tree using 500 bootstrap value. Each Tree belongs to different groups.

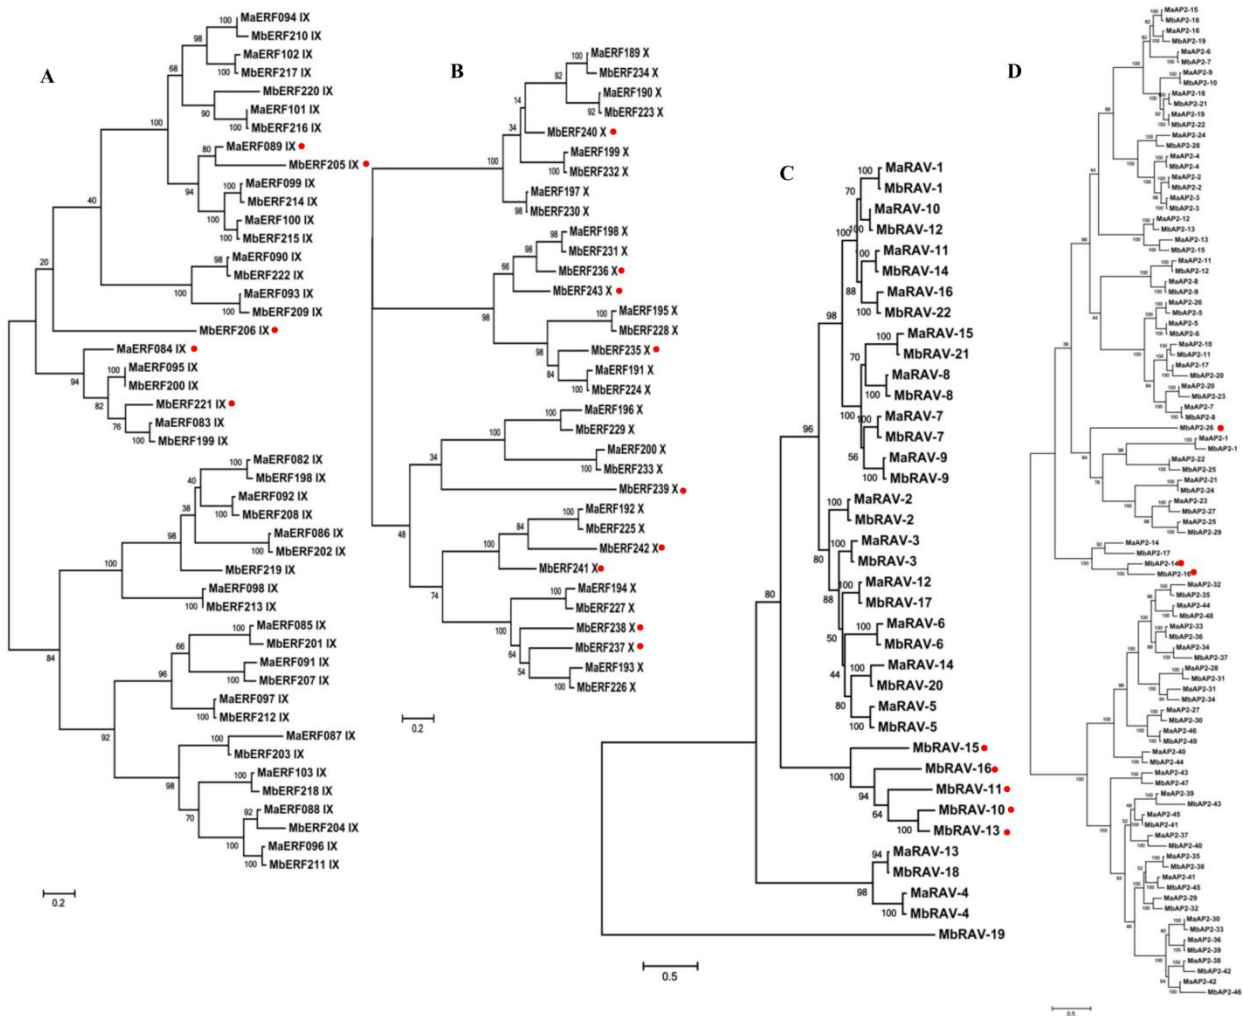

**Figure S5. Phylogenetic tree of proteins of ERF subfamily, RAV and AP2 family.** Each tree shows the evolutionary relationship of genes within family.

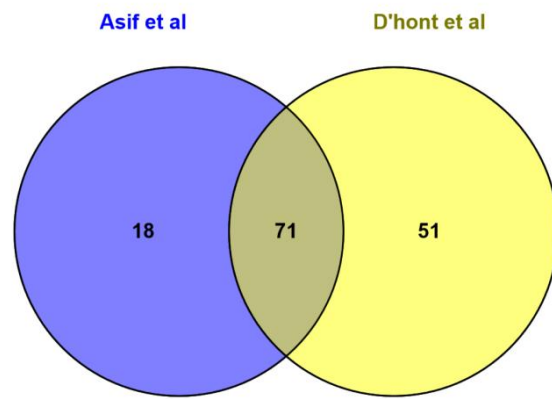

**Figure S6.** Venn diagram of differentially expressing genes obtained from RNA-seq data.

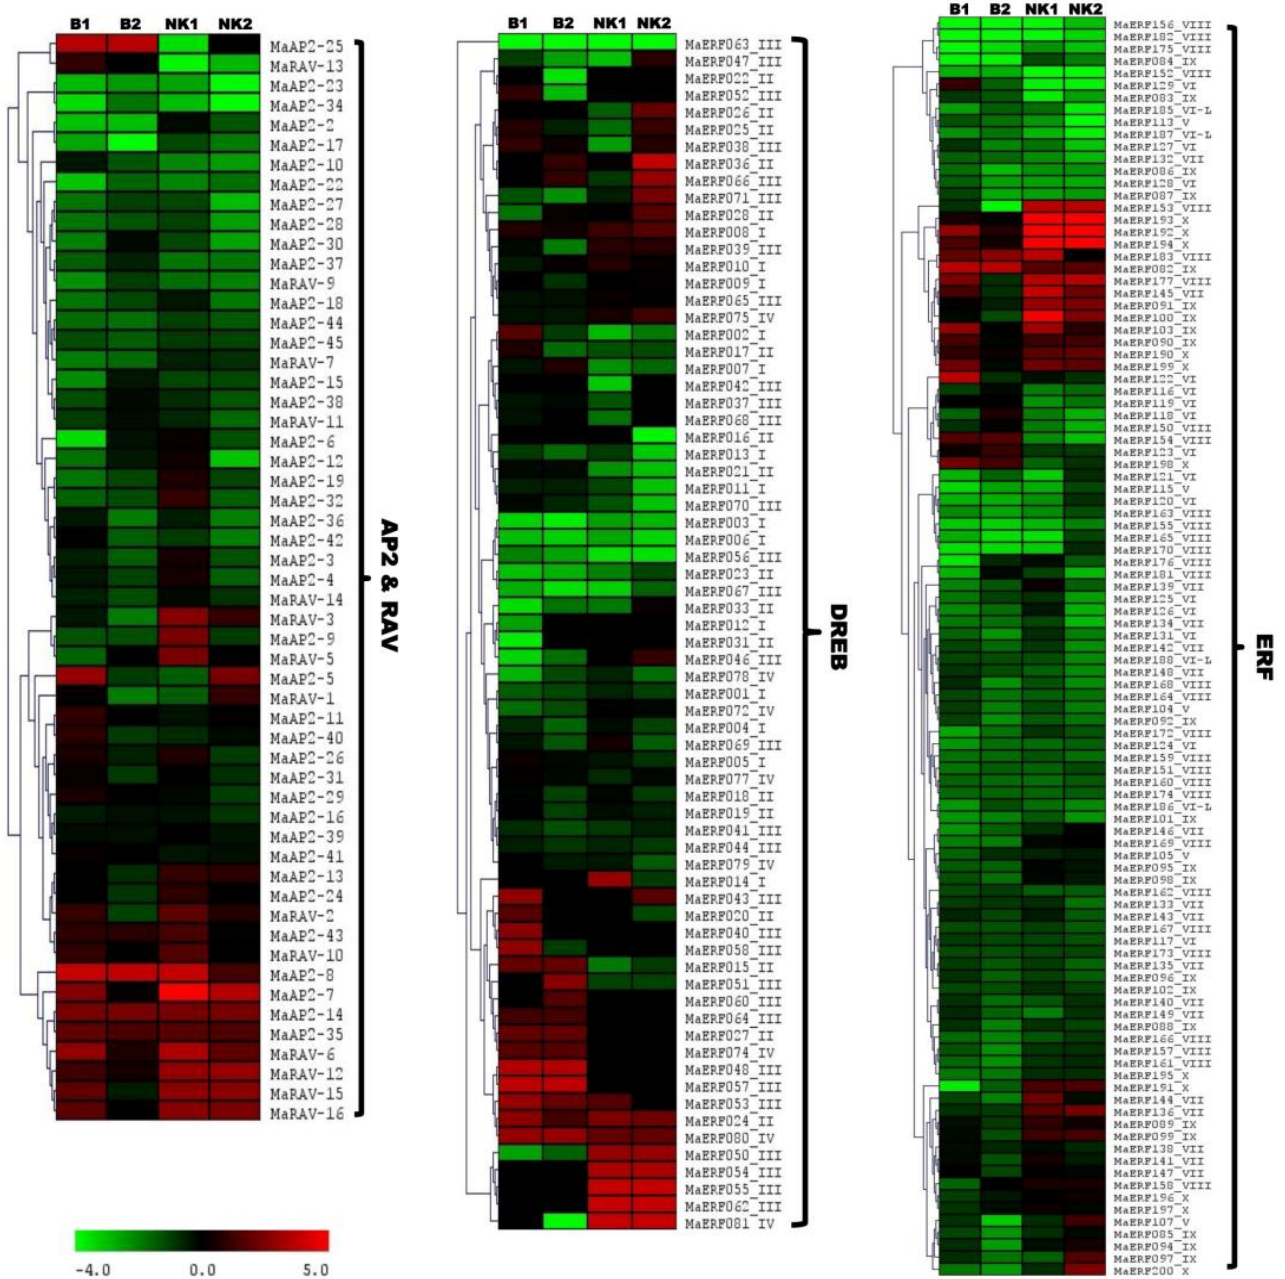

**Figure S7. Heat-map showing the expression pattern of AP2/ERF genes in response to fungus in the root of banana.** Fold change value used to show the differential expression profile of ERF genes in the root of resistant (BK) and susceptible (NK) varieties after infection of fungus at two time points 48h and 90h.



**Table S1.** Conserved motifs present in ERFs in *Musa acuminata*.

| Groups name      | Motifs    |                                                                                      |
|------------------|-----------|--------------------------------------------------------------------------------------|
| <b>Group I</b>   | WDE, KYPS |    |
|                  | LNFP      |    |
| <b>Group II</b>  | EAR motif |    |
|                  | LNFP      |    |
|                  | LWSF      |    |
| <b>Group III</b> | LPR[P/A]  |  |
|                  | D[I/V]QAA |  |
|                  |           |  |
| <b>Group IV</b>  | LPRPS     |  |
| <b>Group V</b>   |           |  |
|                  | TNF       |  |

|           |                 |  |
|-----------|-----------------|--|
| Group VI  | SP[T/V]SVL      |  |
|           | DLFP            |  |
|           | TNF             |  |
| Group VII | MCGGAI[L/L]     |  |
|           | DFEADF          |  |
|           | NFP             |  |
|           | LWS             |  |
|           | SD[E/Q/R]GSN SF |  |
|           | LWP             |  |

|            |           |  |
|------------|-----------|--|
| Group VIII | TNF       |  |
|            | EAR motif |  |
|            |           |  |
| Group IX   | LNFP      |  |
| Group X    |           |  |

**Table S2.** Conserved motifs present in ERFs in *Musa balbisiana*.

| Groups name | Motifs     |                                                                                      |
|-------------|------------|--------------------------------------------------------------------------------------|
| Group I     | LNFP       |    |
|             | WEID, KYPS |    |
|             |            |    |
|             |            |    |
| Group II    | EAR motif  |    |
|             | LWSF       |   |
|             |            |  |
|             |            |  |
| Group III   | LPR[P/A]   |  |
|             |            |  |
|             |            |  |
|             | LWSY       |  |
|             |            |  |

|          |            |  |
|----------|------------|--|
| Group IV |            |  |
|          |            |  |
|          |            |  |
|          |            |  |
| Group V  |            |  |
|          |            |  |
|          |            |  |
|          |            |  |
| Group VI |            |  |
|          |            |  |
|          | SP[T/V]SVL |  |
|          |            |  |

|            |                    |                                                                                      |
|------------|--------------------|--------------------------------------------------------------------------------------|
| Group VII  | MCGGAI[L/L]        |    |
|            | NFP                |    |
|            | DFEAD              |    |
|            | LWS                |    |
|            | SD[E/Q/R]GSN<br>SF |    |
|            |                    |    |
|            |                    |    |
| Group VIII | EAR motif          |  |
|            | TNF                |  |
|            |                    |  |
|            |                    |  |
|            |                    |  |
|            |                    |  |
|            | DLNL               |  |

**Table S3.** List of Primers used in qRT PCR.

| S.no | Gene Name                         | Forward Sequence           | Reverse Sequence            |
|------|-----------------------------------|----------------------------|-----------------------------|
| 1    | MaERF182                          | CCTCGCCCGATATCAACCTC       | GCGATCTACGACGGAGGAAG        |
| 2    | MaERF025                          | AGGCACTACAAGGGTGTGAGGATG   | TGCCTTTCAAGCAGAGCACCGCTGC   |
| 3    | MaERF022                          | TCTCAGAGATCAGAGCACCGAACCAG | GGACATGGTGGTGTCCGGAAGCTGAAT |
| 4    | MaERF083                          | ATCAGAAGGAGGGCGGCGAGACCAAG | GGCGGTGCCGAAGGTGCCGAGCCAGA  |
| 5    | MaAP235                           | ATACTCGAAGGTGCCGGTGGTGG    | CATGGCGGGTGACCTACCTGCCGT    |
| 6    | MaERF173                          | TGTGAGGAAGCGGCCGTGGGAAGG   | CTTGGCCTTGACCCACGGAGCGT     |
| 7    | MaERF161                          | ACACCGTCGAGTCCTCCACCCCTTC  | ACACCGTCGAGTCCTCCACCCCTTC   |
| 8    | MaERF187                          | AGTAGTGGGAAGTTGGAGAGGTCG   | GGTCCACGTGGATCTCCCGGACC     |
| 9    | MaAP2-44                          | AGGAGGACAGCTGCTGCCTAATGG   | GCCGGAGTCGTCGTTCTCCACCTCT   |
| 10   | MaAP2-23                          | ATGGCGGCGACAACGGGAAGCGGAG  | AGCCTCCTCGGCATCGTAAGCAC     |
| 11   | MaERF026                          | GTACAAGGGTGTGAGGATGAGGAGC  | GCAGAGCAAGGCCGCATCGTAGGCT   |
| 12   | MaAP2-13                          | ATCCAGGATCTCCGCGCGGTTCGACG | CTTCCGGTCCACCTGTGCCTGGT     |
| 13   | MaRAV6                            | TGTCGTCGTCTCAGTACAAAGGCG   | GGCTCGCTTGTCGGAGAGAGGCT     |
| 14   | MaAP2-46                          | ACGTGGACGGGATGGCGCCGGAGCTG | ACGCCCTTGCTGCTGCATGCGCAGT   |
| 15   | GSMUA_Achr2T16160_001<br>(ACT101) | ATGACATGGAAAAGATCTGGCA     | CCTGAATGGCAACATACATAGC      |
